# Supplementary material for: The educational attainment of autistic individuals and individuals with high autistic traits: A study of 230,000 people in the United Kingdom
Source: Research Square preprint supplement (doi:10.21203/rs.3.rs-7905433/v1), 2025-10-24
Supplement: Supplementary file 1 [file f105a084c97f744fd992b51a.docx]

**Supplementary Material**

Supplementary Table S1.……………………………………………………………………..…………Page 2

Supplementary Table S2.…………………………………………………………………………………Page 3

Supplementary Table S3.…………………………………………………………………………………Page 4

**Supplementary Table S1: Factors Affecting Educational Attainment**

|  | **Odds Ratio**  **(95% CI)** | **p-value** |
| --- | --- | --- |
| *Autistic vs. Non-Autistic* | | |
| *Model 2* |  |  |
| ADHD | 3.83 (3.53, 4.16) | <2x10-16 |
| Bipolar | 1.35 (1.17, 1.56) | 4.5 x 10-5 |
| Depression | 0.93 (0.89, 0.97) | 8.1 x 10-4 |
| Learning Disability | 1.84 (1.71, 1.97) | <2x10-16 |
| Obsessive Compulsive Disorder | 1.49 (1.34, 1.66) | 3.9 x 10-13 |
| Schizophrenia | 2.83 (2.09, 3.83) | 1.7 x 10-11 |
| *High Autistic vs. Low Autistic Traits (Excluded All Autistic People)* | | |
| *Model 2* |  |  |
| ADHD | 2.05 (1.93, 2.18) | <2x10-16 |
| Bipolar | 1.88 (1.77, 2.00) | <2x10-16 |
| Depression | 1.91 (1.87, 1.95) | <2x10-16 |
| Learning Disability | 2.16 (2.08, 2.25) | <2x10-16 |
| Obsessive Compulsive Disorder | 1.54 (1.47, 1.62) | <2x10-16 |
| Schizophrenia | 1.68 (1.34, 2.11) | 7.0 x 10-6 |

**Supplementary Table S2: Factors Affecting Educational Attainment of Women**

|  | **Odds Ratio**  **(95% CI)** | **p-value** |
| --- | --- | --- |
| *Autistic vs. Non-Autistic Women* | | |
| *Model 2* |  |  |
| ADHD | 4.03 (3.52, 4.61) | <2x10-16 |
| Bipolar | 1.53 (1.29, 1.83) | 1.6 x 10-6 |
| Depression | 0.89 (0.84, 0.94) | 4.9 x 10-5 |
| Learning Disability | 1.84 (1.66, 2.04) | <2x10-16 |
| Obsessive Compulsive Disorder | 1.24 (1.07, 1.43) | 3.6 x 10-3 |
| Schizophrenia | 1.92 (1.14, 3.25) | 0.01 |
| *High Autistic vs. Low Autistic Traits Women (Excluded All Autistic Women)* | | |
| *Model 2* |  |  |
| ADHD | 2.26 (2.10, 2.43) | <2x10-16 |
| Bipolar | 1.94 (1.82, 2.06) | <2x10-16 |
| Depression | 1.95 (1.90, 1.99) | <2x10-16 |
| Learning Disability | 2.23 (2.13, 2.33) | <2x10-16 |
| Obsessive Compulsive Disorder | 1.58 (1.50, 1.66) | <2x10-16 |
| Schizophrenia | 1.76 (1.36, 2.26) | 1.2 x 10-5 |

**Supplementary Table S3: Factors Affecting Educational Attainment of Men**

|  | **Odds Ratio**  **(95% CI)** | **p-value** |
| --- | --- | --- |
| *Autistic vs. Non-Autistic Men* | | |
| *Model 2* |  |  |
| ADHD | 3.70 (3.33, 4.11) | <2 x 10-16 |
| Bipolar | 1.03 (0.80, 1.33) | 0.82 |
| Depression | 0.99 (0.93, 1.06) | 0.83 |
| Learning Disability | 1.84 (1.66, 2.04) | <2 x 10-16 |
| Obsessive Compulsive Disorder | 1.97 (1.66, 2.33) | 4.2 x 10-15 |
| Schizophrenia | 3.12 (2.10, 4.62) | 1.5 x 10-8 |
| *High Autistic vs. Low Autistic Traits Men (Excluded All Autistic Men)* | | |
| *Model 2* |  |  |
| ADHD | 1.76 (1.59, 1.96) | <2 x 10-16 |
| Bipolar | 1.40 (1.14, 1.72) | 1.2 x 10-3 |
| Depression | 1.69 (1.59, 1.80) | <2 x 10-16 |
| Learning Disability | 1.94 (1.78, 2.11) | <2 x 10-16 |
| Obsessive Compulsive Disorder | 1.21 (1.02, 1.44) | 0.03 |
| Schizophrenia | 1.45 (0.87, 2.41) | 0.16 |
